# Supplementary material
Source: PubMed Central journal article supplement (PMC7116814)
Supplement: EMS116657-supplement_Supplementary_Appendix.pdf [file EMS116657-supplement_Supplementary_Appendix.pdf]

#### **Appendix A. Search strategy used**

((("Mental Health"[Mesh] OR "Mental health" OR "mental disorder\*" OR "depression" OR "affective disorders" OR "mood disorders" OR "anxiety" OR "psychosis" OR "schizophrenia" OR "bipolar disorders")) AND ("Social Stigma"[Mesh] OR "Stigma" OR "stereotypes" OR "beliefs" OR "attitudes" OR "prejudice" OR "social perception" OR "social distance" OR "discrimination")) AND ("India"[Mesh] OR "India")
